# Supplementary material for: Hedgehog inhibits β-catenin activity in synovial joint development and osteoarthritis
Source: JCI journal article supplement (doi:10.1172/jci80205), 2016-03-27
Supplement: sd1 [file 1]

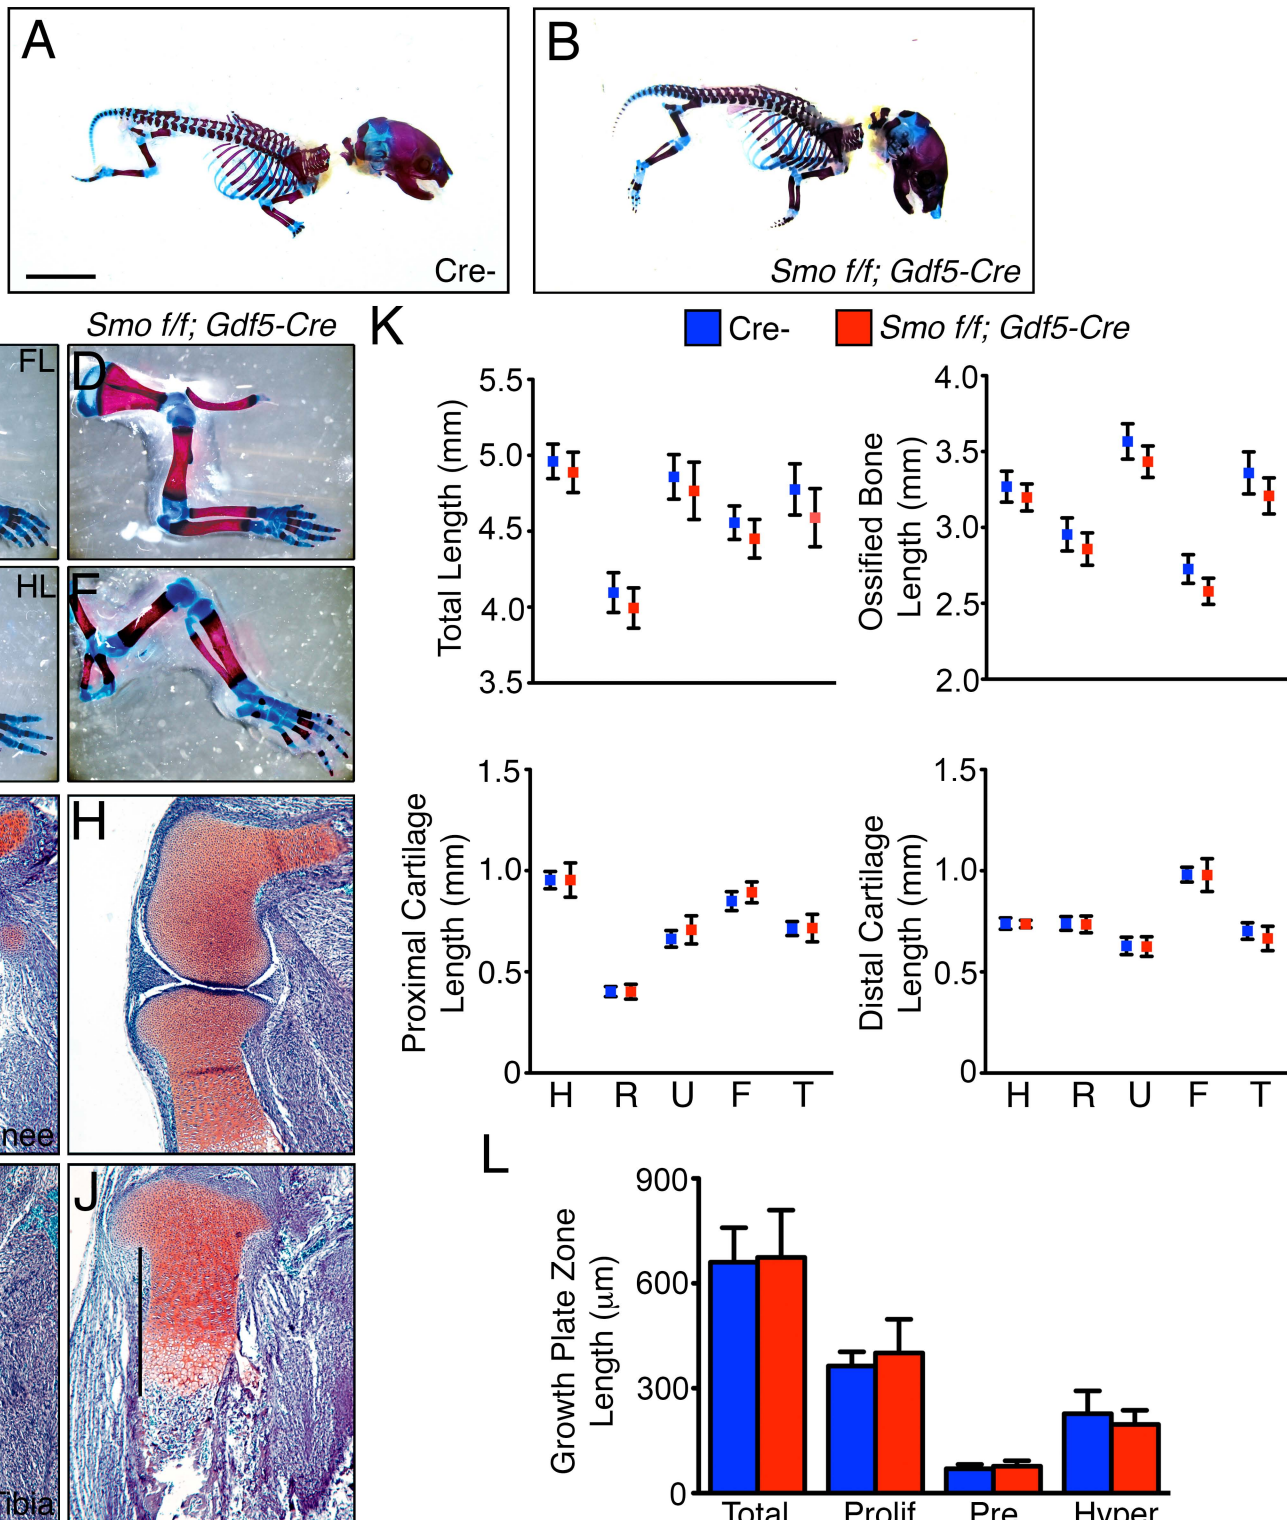

**Figure S1. Conditional deletion of hedgehog signaling in interzone progeny does not affect joint or skeletal morphogenesis.** (A-F) P0 Cre- or *Smo f/f; Gdf5-Cre* mice were stained by alcian blue/alizarin red. There were no overt differences in skeletal formation in whole skeletons (A & B), forelimbs (FL; C & D) or hindlimbs (HL; E & F). (G-J) E17.5 hindlimb sections were stained by SafO. Consistent with P0, there were no observable differences in knee joints (G & H) or growth plates (I & J) between Cre- (G, I) and *Smo f/f; Gdf5-Cre* (H, J) mice. (I, J) Black bars indicate length of growth plates. (K) Proximal and distal cartilage, and bone from the long bones of the forelimbs and hindlimbs of Cre- (blue) and *Smo f/f; Gdf5-Cre* (red) mice at P0 were measured. H, humerus; R, radius; U, ulna; F, femur; T, tibia. Bars are mean  $\pm$  95% CI. No significant differences were observed in total bone length, proximal cartilage length, distal cartilage length, or ossified region as determined by Student's t-tests ( $p > 0.05$ ).  $n \geq 9$  per genotype. (L) Growth plate zone length was measured from Cre- (blue) and *Smo f/f; Gdf5-Cre* (red) mice at E17.5. No significant differences were observed in total, proliferative (Prolif), prehypertrophic (Pre) or hypertrophic (Hyper) zone lengths as determined by Student's t-tests ( $p > 0.05$ ).  $n \geq 4$  per genotype. Scale bars: (A) 1 cm, (C) 2 mm, (G) 200  $\mu\text{m}$ .

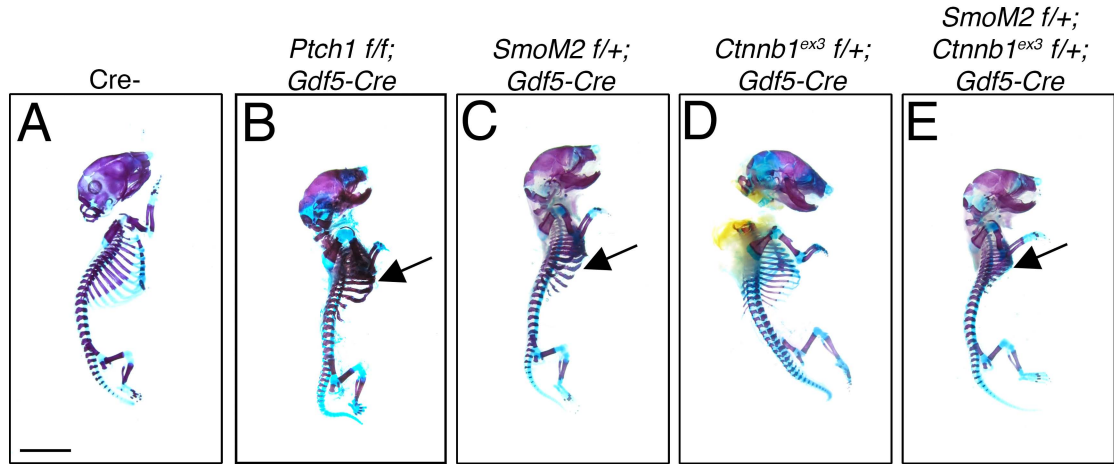

**F**

■ Cre- ■ *Ptch1 f/f; Gdf5-cre*

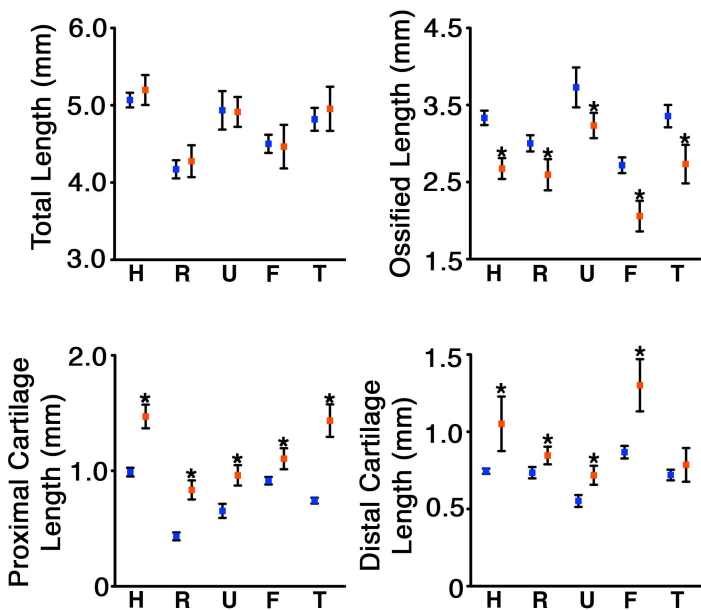

**G**

■ Cre- ■ *SmoM2 f/+; Gdf5-Cre*  
 ■ *Ctnnb1<sup>ex3</sup> f/+; Gdf5-Cre* ■ *SmoM2 f/+; Ctnnb1<sup>ex3</sup> f/+; Gdf5-Cre*

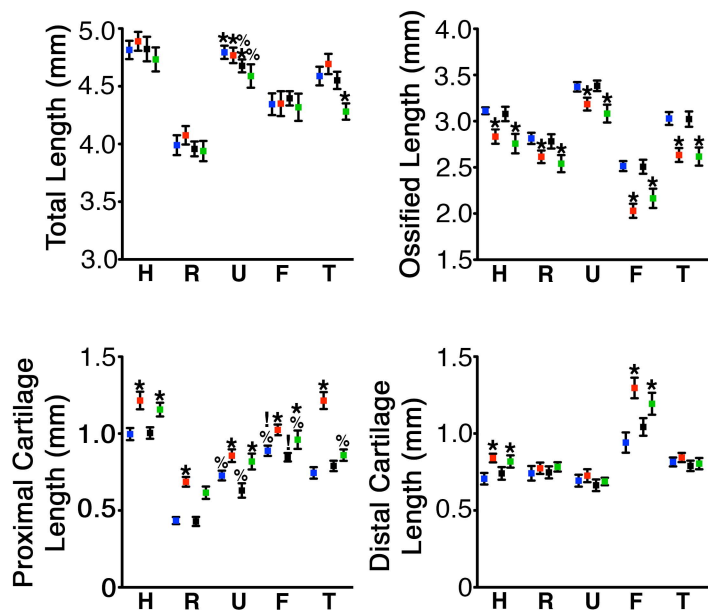

**H**

■ Cre- ■ *Ptch1 f/f; Gdf5-cre*

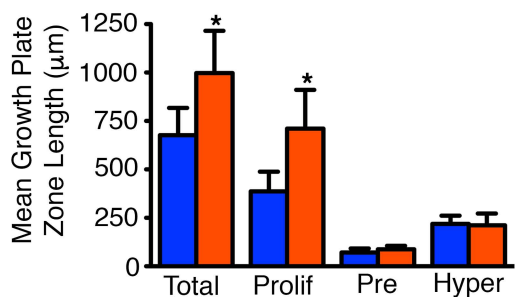

**I**

■ Cre- ■ *SmoM2 f/+; Gdf5-Cre*  
 ■ *Ctnnb1<sup>ex3</sup> f/+; Gdf5-Cre* ■ *SmoM2 f/+; Ctnnb1<sup>ex3</sup> f/+; Gdf5-Cre*

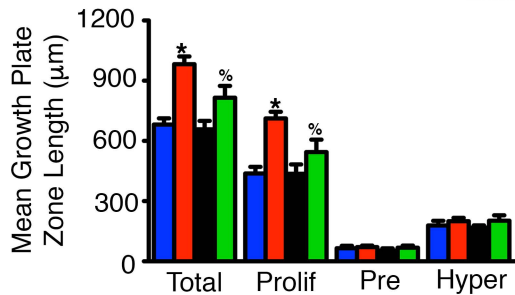

**J**

■ Cre- ■ *Ptch1 f/f; Gdf5-cre*

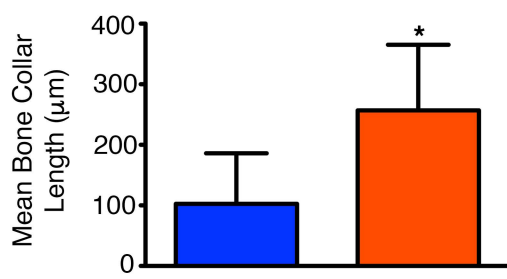

**K**

■ Cre- ■ *SmoM2 f/+; Gdf5-Cre*  
 ■ *Ctnnb1<sup>ex3</sup> f/+; Gdf5-Cre* ■ *SmoM2 f/+; Ctnnb1<sup>ex3</sup> f/+; Gdf5-Cre*

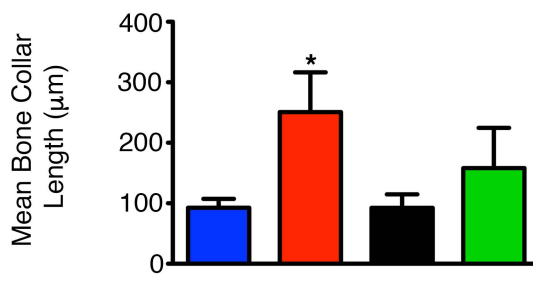

**Figure S2. Conditional deletion of *Ptch1* or expression of *SmoM2* in interzone progeny induces cartilage and bone dysplasias, some of which can be rescued by activation of  $\beta$ -catenin.** (A-E) Newborn (P0) mouse skeletons were stained with alcian blue/alizarin red for cartilage/bone. Mice with active hedgehog signaling in interzone progeny were perinatal lethal with increased ossification of the rib cage (B & C; arrows). (D) There were no overt skeletal phenotypes when  $\beta$ -catenin was activated in interzone cells alone. (E) Co-activation of  $\beta$ -catenin in interzone progeny could not rescue the hedgehog-induced perinatal lethality or the rib cage phenotype (arrow). (F-K) Length measurements of skeletal elements were made from forelimbs and hindlimbs of (F, H, J) Cre- (blue), or *Ptch1 f/f; Gdf5-Cre* (orange) mice and (G, I, K) Cre- (blue), *SmoM2 f/+; Gdf5-cre* (red), *Ctnnb<sup>ex3</sup> f/+; Gdf5-cre* (black) or *SmoM2 f/+; Ctnnbex3 f/+; Gdf5-cre* (green) mice. (F & G) Total, ossified, proximal cartilage and distal cartilage length were measured from P0 alcian blue/alizarin red stained whole mount long bones. H, humerus; R, radius; U, ulna; F, femur; T, tibia.  $n \geq 5$  for each genotype. (H & I) Total, proliferative zone (Prolif), prehypertrophic zone (Pre) and hypertrophic zone (Hyper) lengths of the growth plate were measured from E17.5 mouse hindlimb sections stained with SafO.  $n \geq 4$  per genotype. (J & K) Mean bone collar length surrounding the dorsal and ventral sides of the tibial growth plate were measured from E17.5 hindlimb sections stained by Von Kossa.  $n \geq 4$  per genotype. (F-K) Data are mean  $\pm$  95% CI. (F, H, J) \*,  $p < 0.05$  by Student's t-test. (G, I, K) Data was analyzed by one way ANOVA and Tukey's post-hoc tests. Unlabeled bars or bars labeled with the same symbol are not significantly different within each limb element (G), within each zone (I) or between genotypes (K). Scale bar: (A) 1 cm.



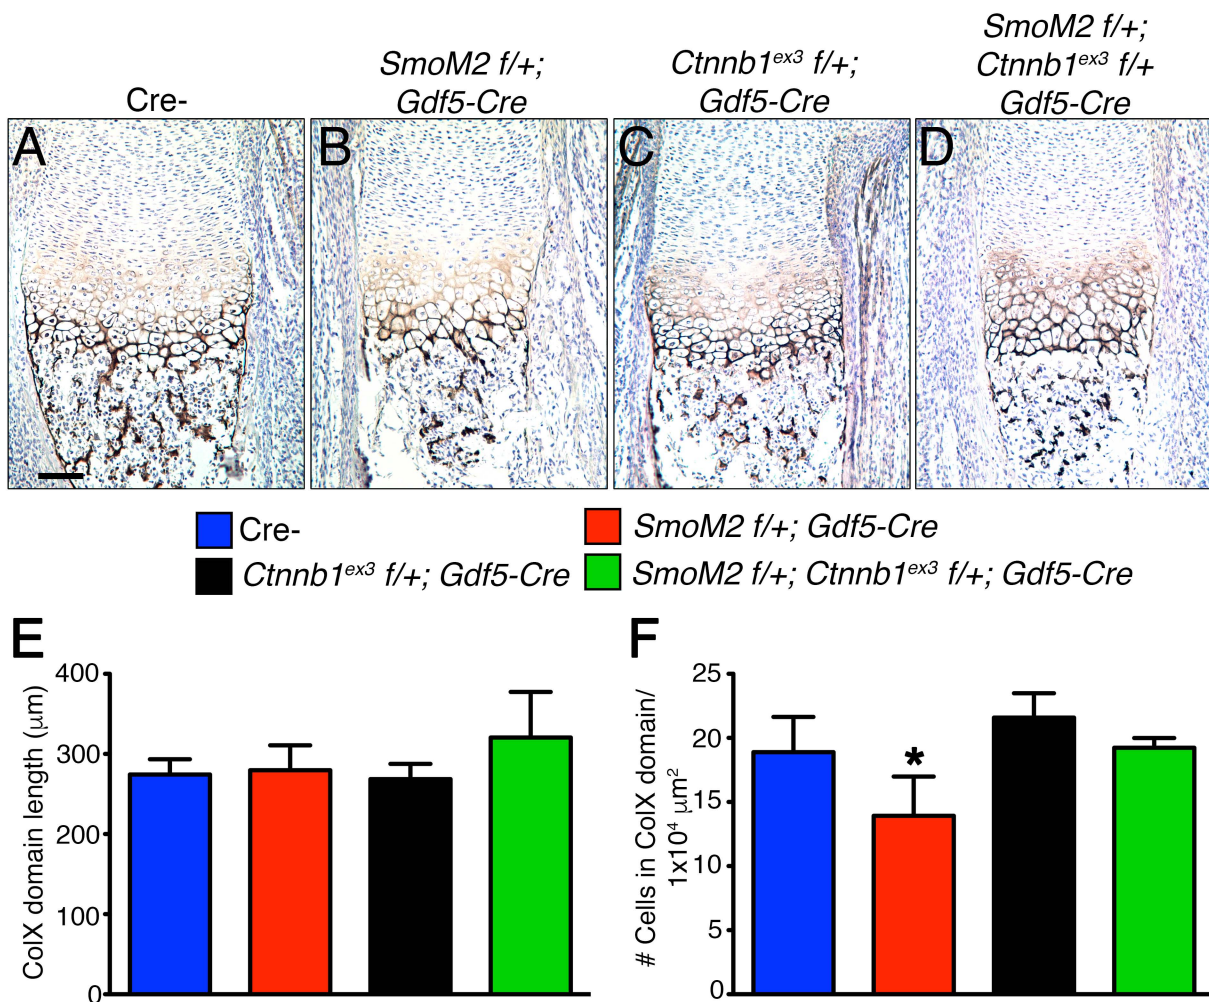

**Figure S3. Activation of hedgehog signaling decreases cell density in the type X collagen domain.** (A-D) Hindlimb sections from E17.5 mice were stained by immunohistochemistry for type X collagen. (E & F) The length of the type X collagen staining domain was measured (E) and the number of cells within the type X collagen staining domain/ $10^4 \mu\text{m}^2$  (F) was determined in Cre- (blue), *SmoM2 f/+; Gdf5-Cre* (red), *Ctnnb1<sup>ex3</sup> f/+; Gdf5-Cre* (black), and *SmoM2 f/+; Ctnnb1<sup>ex3</sup> f/+; Gdf5-Cre* (green) mice. Bars are mean  $\pm$  95% CI. (E) There was no significant differences in the length of the type X collagen staining domain ( $p > 0.05$ ), as determined by one-way ANOVA.  $n \geq 6$  per genotype. (F) There was a significant reduction in the number of cells within the type X collagen staining domain per  $10^4 \mu\text{m}^2$  in *SmoM2 f/+; Gdf5-Cre* mice as compared to all other genotypes as analyzed by one-way ANOVA followed by Tukey's post-hoc tests (\*,  $p < 0.01$  compared to all other bars).  $n \geq 6$  per genotype. Scale bar: (A) 100  $\mu\text{m}$ .



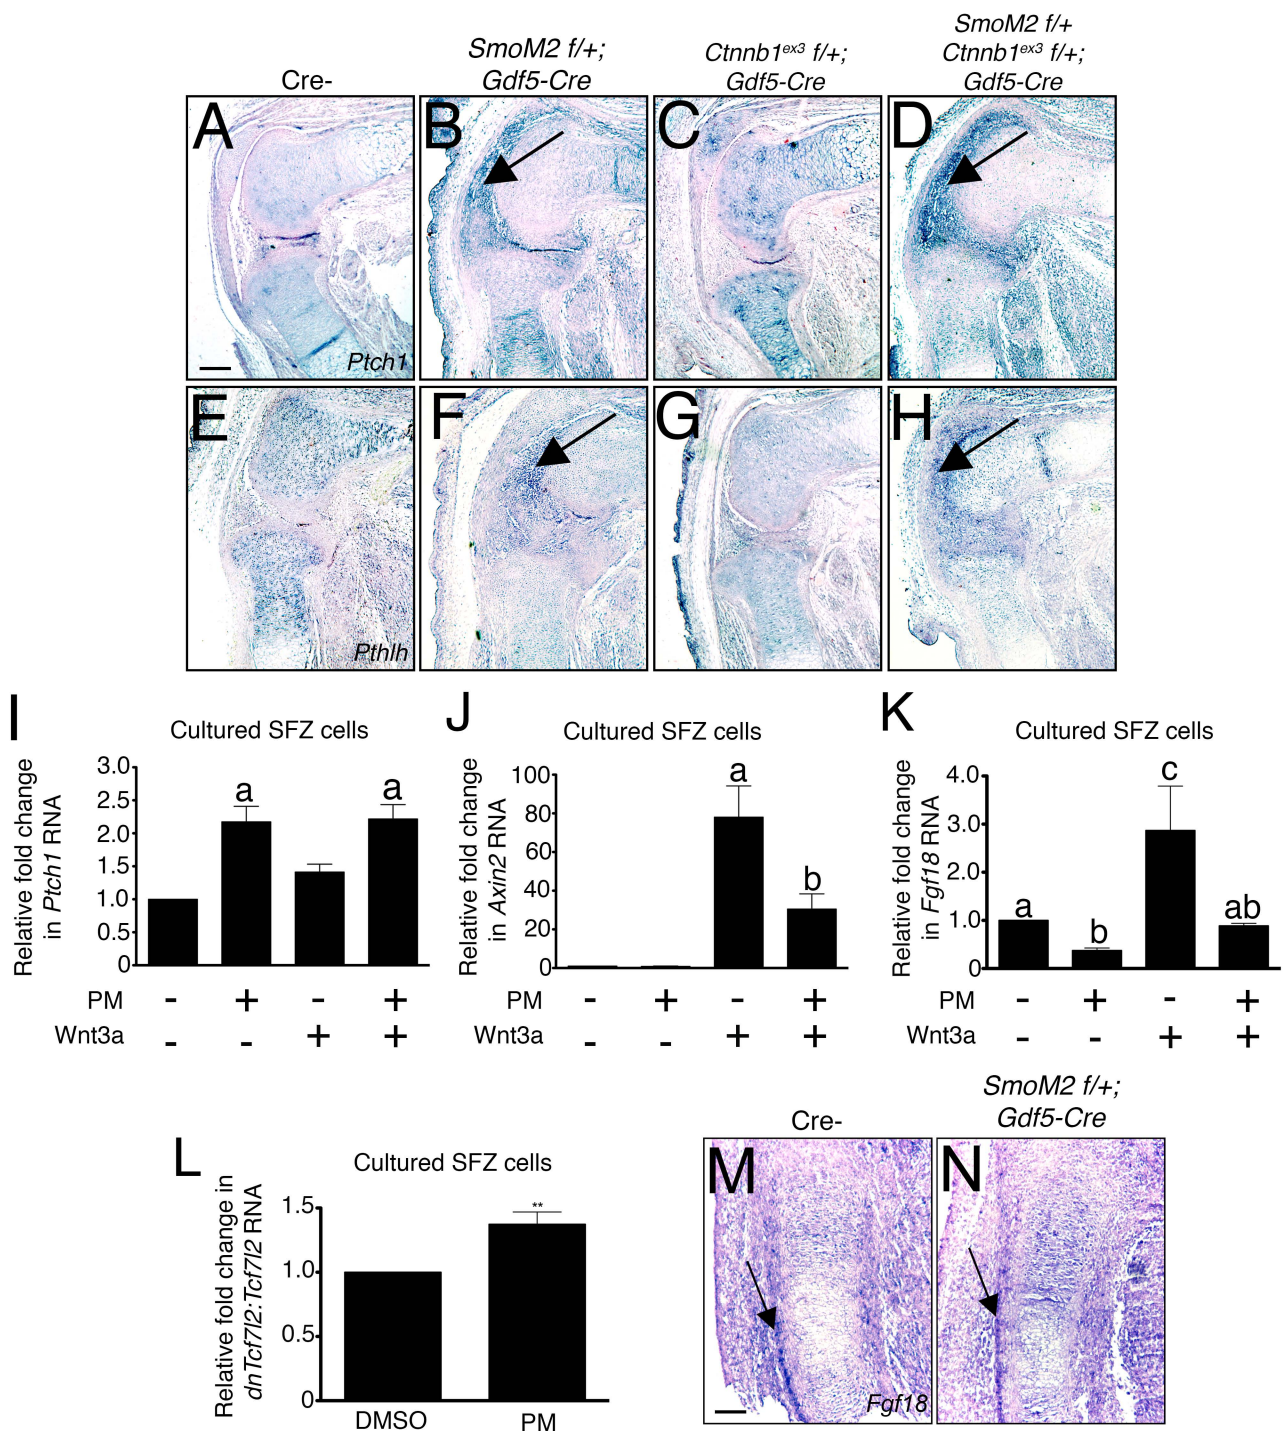

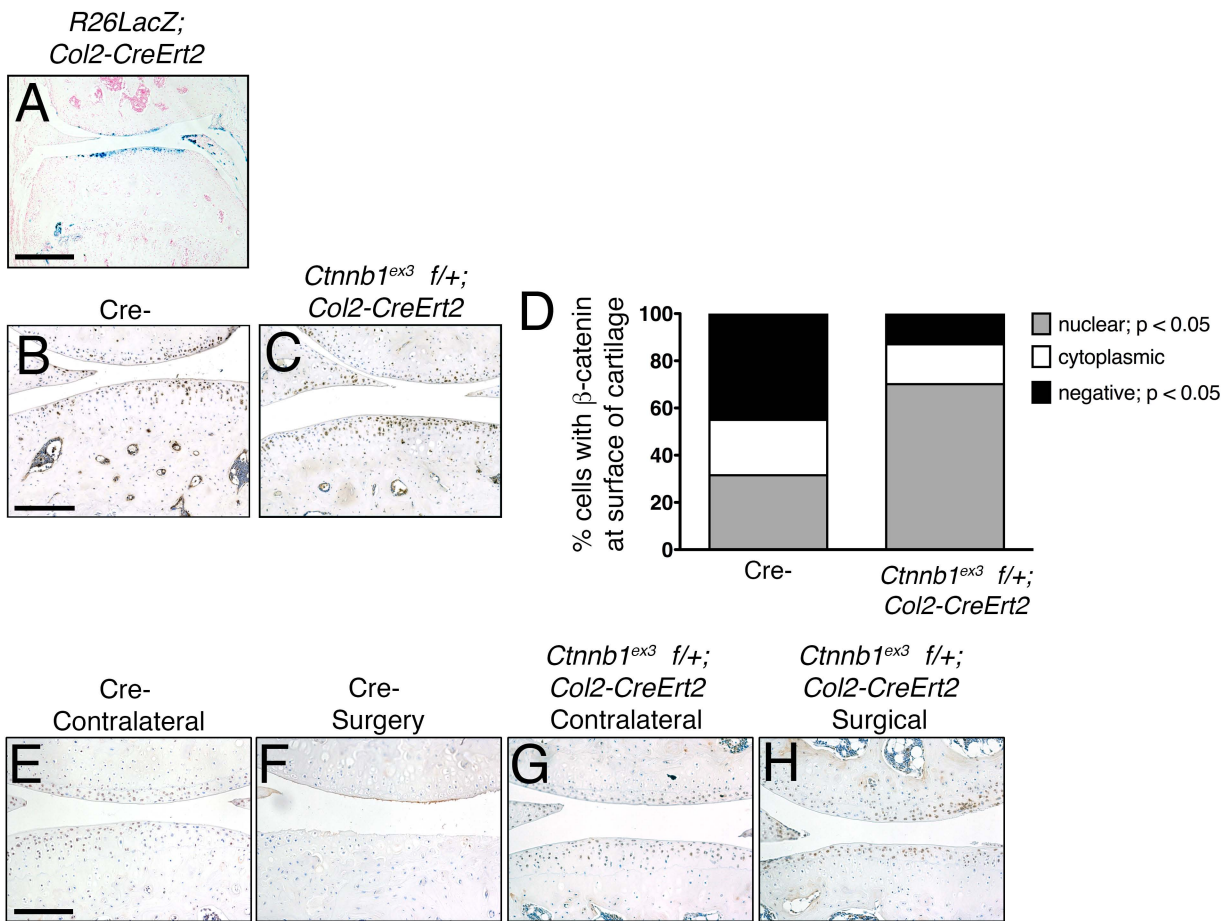

**Figure S5. *Col2-CreErt2* recombination efficiency and protein expression in transgenic mice and surgically-induced OA mice.** (A) *R26LacZ f/+*; *Col2-CreErt2* mice were injected with tamoxifen at 8 weeks of age. Knees were collected 6 weeks after tamoxifen injection and stained with XGal. (B & C) Cre- or *Ctnnb1<sup>ex3</sup> f/+*; *Col2-CreErt2* were injected with tamoxifen at 8 weeks of age and collected 6 weeks after injection. Sections were stained for  $\beta$ -catenin by immunohistochemistry. (D)  $\beta$ -catenin localization was counted in 6 independent regions across the surface of the cartilage correlating to the zone of XGal staining identified in (A) in tamoxifen-treated Cre- and *Ctnnb1<sup>ex3</sup> f/+*; *Col2-CreErt2* mice. A significant increases in the proportion of cells with nuclear localized  $\beta$ -catenin (grey) and a significant reduction in cells without  $\beta$ -catenin were observed in *Ctnnb1<sup>ex3</sup> f/+*; *Col2-CreErt2* compared to Cre- mice ( $p < 0.05$ ). Total cells counted: Cre- = 130, *Ctnnb1<sup>ex3</sup> f/+*; *Col2-CreErt2* = 214 from  $n = 3$  independent mice per genotype. Proportional data was log transformed prior to analysis by multiple Student's t-tests. (E-H) Activation of  $\beta$ -catenin does not prevent the expression of ADAMTS5 in surgically-induced OA mice (H) compared to contralateral controls (G) as determined by immunohistochemistry. The absence of ADAMTS5 staining in Cre- mice with surgically-induced OA (F) is likely a result of loss of cartilage and cells at the surface as compared to contralateral limbs (E). Images are representative of  $n = 3$  mice per genotype. Scale Bars (A) 400  $\mu$ m, (B) 200  $\mu$ m, (C) 100  $\mu$ m.

● Cre-    ■ *SmoM2 f/+; Col2-CreErt2*  
 ▼ *Ctnnb1<sup>ex3</sup> f/+; Col2-CreErt2*  
 ▲ *SmoM2 f/+; Ctnnb1<sup>ex3</sup> f/+; Col2-CreErt2*

● Cre- Contralateral    ■ Cre- Surgery  
 ▼ *Ctnnb1<sup>ex3</sup> f/+; Col2-CreErt2* Contralateral  
 ▲ *Ctnnb1<sup>ex3</sup> f/+; Col2-CreErt2* Surgery

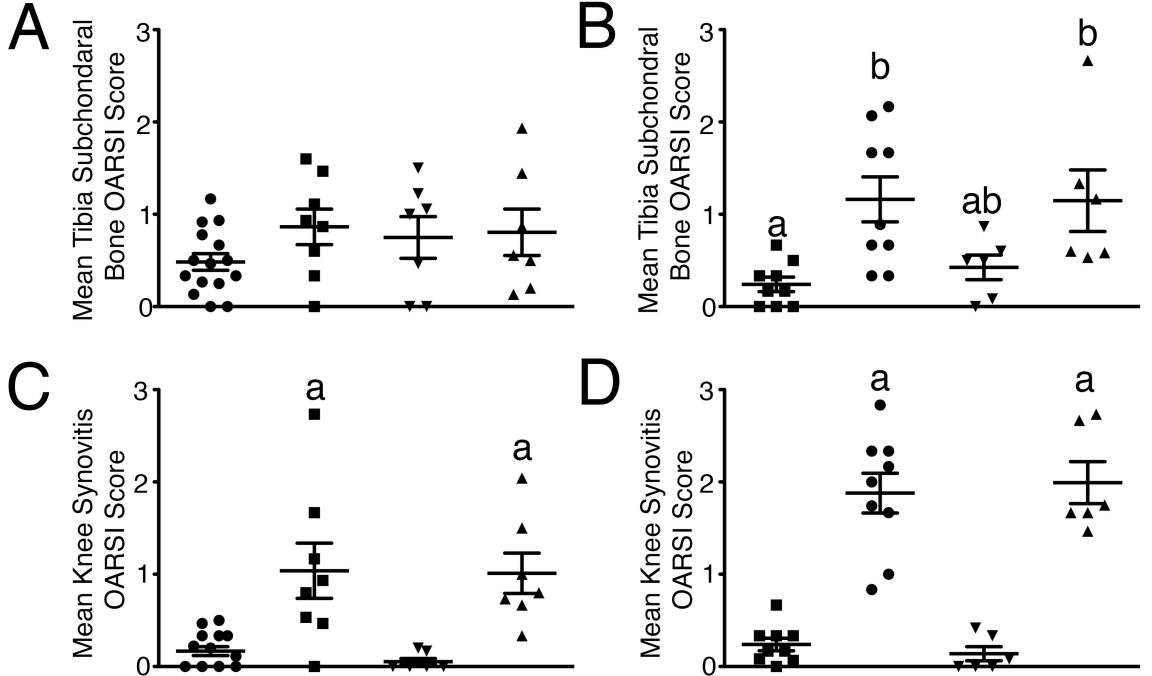

**Figure S6. OARSI scoring of subchondral bone thickening and synovitis from transgenic and surgically-induced OA mice.** Average OARSI score of subchondral bone (A & B) or knee synovitis (C & D) was determined from transgenic alone (A & C) or transgenic and surgically-induced OA (B & D) mice. Individual points are an average of 3-8 sections from two-four slides separated by a minimum of 60  $\mu$ m and graded by OARSI scoring recommended for the mouse by 3 blinded, independent reviewers. Bars are mean  $\pm$  SE. Data was analyzed by one-way ANOVA followed by Tukey's post-hoc tests. Unlabeled bars or bars labeled with the same letter are not significantly different ( $p > 0.05$ ).  $n \geq 6$  per group.



**Table S1. Summary of characterization of cellular phenotypes from histological sections of mouse tibias.**

| Genotype \ Phenotype  | <i>SmoM2 f/+; Ctnnb1<sup>ex3</sup> f/+;</i> |                                          |                                                         |                                                                              | <i>Ctnnb1<sup>ex3</sup> f/+; Col2-CreErt2</i> |                 |                                                                          |                                                                    |
|-----------------------|---------------------------------------------|------------------------------------------|---------------------------------------------------------|------------------------------------------------------------------------------|-----------------------------------------------|-----------------|--------------------------------------------------------------------------|--------------------------------------------------------------------|
|                       | Cre-<br>Contralateral                       | <i>SmoM2 f/+;</i><br><i>Col2-CreErt2</i> | <i>Ctnnb1<sup>ex3</sup> f/+;</i><br><i>Col2-CreErt2</i> | <i>SmoM2 f/+;</i><br><i>Ctnnb1<sup>ex3</sup> f/+;</i><br><i>Col2-CreErt2</i> | Cre-<br>Contralateral                         | Cre-<br>Surgery | <i>Ctnnb1<sup>ex3</sup> f/+;</i><br><i>Col2-CreErt2</i><br>Contralateral | <i>Ctnnb1<sup>ex3</sup> f/+;</i><br><i>Col2-CreErt2</i><br>Surgery |
| Superficial Zone Loss | -                                           | ++                                       | -                                                       | -/+                                                                          | -                                             | ++/+++          | -                                                                        | +                                                                  |
| Empty Lacunae         | -                                           | -/+                                      | -                                                       | -                                                                            | -                                             | + / ++          | -                                                                        | -/+                                                                |
| Decreased Cellularity | -                                           | ++                                       | -                                                       | -                                                                            | -                                             | ++              | -                                                                        | +                                                                  |
| Chondrocyte Clusters  | -                                           | -/+                                      | -                                                       | -                                                                            | -                                             | +               | -                                                                        | -/+                                                                |

-, minimal (< 10%); +, moderate (10-30%); ++, strong (30-50%) +++; very strong (> 50%).
